# Supplementary material
Source: publisher site journal article supplement (https://www.dovepress.com/article/305946)
Supplement: Supplementary file 1 [file get_supplementary_file.php]

**LncRNA HOXA-AS2 Promotes Tumor Progression by Suppressing miR-567 Expression in Oral Squamous Cell Carcinoma**

**Running title: LncRNA HOXA-AS2 promotes OSCC progression**

Rui Chen1, Xi Wang2,3, Shixian Zhou2,4, Zongyue Zeng2,*

1.Department of [Oral](javascript:;) [and](javascript:;) [Maxillofacial](javascript:;) [Surgery](javascript:;), The First Affiliated Hospital of Chongqing Medical University, Chongqing, China,400016

2. Department of Laboratory Medicine, The First Affiliated Hospital of Chongqing Medical University, Chongqing, China, 400016

3.Key Laboratory of Diagnostic Medicine designated by the Ministry of Education, Department of Laboratory Medicine, Chongqing Medical University, Chongqing, China,400016

4.Department of Pathology, Central Hospital of Jiangjin District, Chongqing, China, Chongqing, China, 402260

* **CORRESPONDENCE**

Zongyue Zeng, MD, PhD

Department of Laboratory Medicine,

The First Affiliated Hospital of Chongqing Medical University,

Chongqing, China, 400016

Tel. (86) 023-8895-5532

Email: [zengzongyue@126.com](mailto:zengzongyue@126.com)

**Figure legend**

**Supplement Figure.1 The expression of mir-567’s potential targeting genes.**

The mir-567’s potential targeting genes were determined by qRT-PCR. * means *P* <0.05, and NS means no significance.


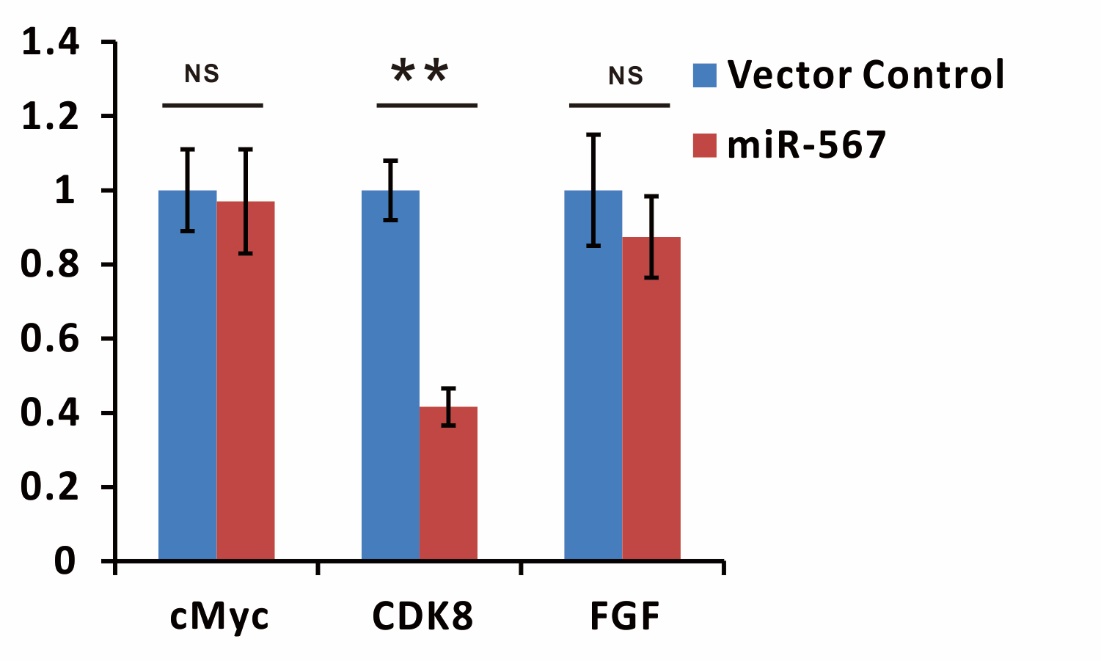


**Supplement Table.1** TheOligo sequences used in the study.

| **Oligonucletide_Name** | **sequence in 5'-3'** |
| --- | --- |
| pSEB-LncRNA HOXA-AS2 Fwd | aagaagcttgaaaaggaaacgccaagacatagaaaac |
| pSEB-LncRNA HOXA-AS2 Rvs | gaagaattctggacctcacaagattatttaattcttaagatg |
| LncRNA HOXA-AS2-Mut1 Fwd | ttgacaagagttcagctcaagttgaGTGtacatacacacactctcacacacaaattatg |
| LncRNA HOXA-AS2-Mut1 Rvs | cataatttgtgtgtgagagtgtgtgtatgtaCACtcaacttgagctgaactcttgtcaa |
| LncRNA HOXA-AS2-Mut2 Fwd | ttgacaagagttcagctcaagttgaacaGTGatacacacactctcacacacaaattatg |
| LncRNA HOXA-AS2-Mut2 Rvs | cataatttgtgtgtgagagtgtgtgtatCACtgttcaacttgagctgaactcttgtcaa |
| pSEB-si-ctrl-1 Fwd | gatcaAAAAAGCAAAGACGCAATAATACATTTTTt |
| pSEB-si-ctrl-1 Rvs | cgtaAAAAATGTATTATTGCGTCTTTGCTTTTTt |
| pSEB-si-ctrl-2 Fwd | aattaAAAAAGCACAAAGAACGACTATAATTTTTt |
| pSEB-si-ctrl-2 Rvs | agctaAAAAATTATAGTCGTTCTTTGTGCTTTTTt |
| pSEB-si-ctrl-3 Fwd | cgcgaAAAAAGAAACACGATTAACAGACATTTTTt |
| pSEB-si-ctrl-3 Rvs | tcgaaAAAAATGTCTGTTAATCGTGTTTCTTTTTt |
| pSEB-si-LncRNA HOXA-AS2-1 Fwd | gatcaAAAAAtggagaagttctgcgctccTTTTTt |
| pSEB-si-LncRNA HOXA-AS2-1 Rvs | cgtaAAAAAggagcgcagaacttctccaTTTTTt |
| pSEB-si-LncRNA HOXA-AS2-2 Fwd | gatcaAAAAAggaaccgtggagggccaacTTTTTt |
| pSEB-si-LncRNA HOXA-AS2-2 Rvs | cgtaAAAAAgttggccctccacggttccTTTTTt |
| pSEB-si-LncRNA HOXA-AS2-3 Fwd | gatcaAAAAAgacaacagtatctctgtaaTTTTTTt |
| pSEB-si-LncRNA HOXA-AS2-3 Rvs | cgtaAAAAAAttacagagatactgttgtcTTTTTt |
| hsa-mir-567 RT | GTCGTATCCAGTGCAGGGTCCGAGGTATTCGCACTGGATACGACGTTCTG |
| LncRNA HOXA-AS2 qPCR Fwd | attgtctccaactccaggcg |
| LncRNA HOXA-AS2 qPCR Rvs | ctcccactcccagaaagctg |
| CDK8 qPCR Fwd | ttccaatccacatgctgcct |
| CDK8 qPCR Rvs | cgatgcagctcagtaccgat |
| hsa-mir-567 qPCR Fwd | AGCCTAGTATGTTCTTCCAGG |
| hsa-mir-567 qPCR Rvs | GTGCAGGGTCCGAGGTCCGAG |
